# Supplementary material for: Knowledge translation strategies for dissemination with a focus on healthcare recipients: an overview of systematic reviews
Source: Springer Nature journal article supplement (doi:10.1186/s13012-020-0974-3), 2020-03-04
Supplement: MOESM6 [file 13012_2020_974_MOESM6_ESM.pdf]

*Additional file 6. Types of outcome measures*

| Reference              | Access | Adherence/Compliance | Attitude /Motivation | Awareness | Behaviour/Intention | Beliefs | Clinical results | Communication with physician | Costs | Coverage | Decision -making | Empowerment/ Engagement | Knowledge /understanding | Less suffering/ Anxiety | Persuasion | Safety | Satisfaction | Skill and competence (Self | Social support | Use of services | Health literacy | Perception | Quality of life | Use of information | Health status and wellbeing | Hospitalizations | Length of consultation | Participation in health | Adiction to media | Sustainability | Choice |  |
|------------------------|--------|----------------------|----------------------|-----------|---------------------|---------|------------------|------------------------------|-------|----------|------------------|-------------------------|--------------------------|-------------------------|------------|--------|--------------|----------------------------|----------------|-----------------|-----------------|------------|-----------------|--------------------|-----------------------------|------------------|------------------------|-------------------------|-------------------|----------------|--------|--|
| Abu Abed 2014          |        |                      |                      |           | x                   |         |                  |                              |       |          |                  |                         |                          |                         |            |        |              |                            |                |                 | x               |            |                 |                    |                             |                  |                        |                         |                   |                |        |  |
| Akesson 2006           | x      |                      |                      |           | x                   |         | x                | x                            | x     |          |                  | x                       | x                        | x                       |            |        | x            | x                          | x              |                 | x               |            |                 |                    |                             |                  |                        |                         |                   |                |        |  |
| Akl 2011a <sup>1</sup> |        |                      |                      |           | x                   |         |                  | x                            |       |          |                  |                         | x                        |                         |            |        |              |                            |                |                 |                 | x          |                 |                    |                             |                  |                        |                         |                   |                |        |  |
| Akl 2011b <sup>2</sup> |        |                      |                      |           | x                   |         |                  | x                            |       |          |                  |                         | x                        |                         |            |        |              |                            |                |                 |                 | x          |                 |                    |                             |                  |                        |                         |                   |                |        |  |
| Ammentorp 2013         |        |                      |                      |           |                     |         |                  |                              |       |          |                  | x                       |                          |                         |            |        |              | x                          |                |                 |                 |            |                 |                    |                             |                  |                        |                         |                   |                |        |  |
| Ammenwerth 2012        | x      |                      |                      |           | x                   |         |                  | x                            |       |          |                  | x                       | x                        |                         |            |        |              |                            | x              | x               |                 |            |                 |                    |                             |                  |                        |                         |                   |                |        |  |
| Atherton 2010          | x      |                      |                      |           | x                   |         |                  | x                            |       | x        | x                |                         | x                        |                         | x          |        | x            |                            |                | x               |                 |            |                 |                    |                             |                  |                        |                         |                   |                |        |  |
| Bekker 2013            |        | x                    | x                    |           | x                   |         |                  | x                            |       |          | x                | x                       | x                        | x                       | x          | x      | x            | x                          |                | x               |                 |            |                 |                    |                             |                  |                        |                         |                   |                | x      |  |
| Berkman 2011           |        | x                    |                      |           | x                   |         | x                |                              | x     |          | x                |                         | x                        |                         |            |        |              | x                          | x              | x               |                 |            | x               |                    |                             |                  |                        |                         |                   |                |        |  |
| Büchter 2014           |        | x                    |                      |           | x                   |         |                  |                              |       |          |                  |                         |                          |                         |            |        | x            |                            |                |                 |                 |            |                 |                    |                             |                  |                        |                         |                   |                |        |  |
| Car 2011               |        |                      |                      |           | x                   |         |                  | x                            |       |          |                  |                         | x                        |                         |            |        |              | x                          |                |                 |                 |            |                 | x                  |                             |                  |                        |                         |                   |                |        |  |

<sup>1</sup> Akl EA, Oxman AD, Herrin J, Vist GE, Terrenato I, Sperati F, et al. Framing of health information messages. Cochrane Database of Systematic Reviews. 2011(12):CD006777.

<sup>2</sup> Akl EA, Oxman AD, Herrin J, Vist GE, Terrenato I, Sperati F, et al. Using alternative statistical formats for presenting risks and risk reductions. Cochrane Database of Systematic Reviews. 2011(3):CD006776.
